# Supplementary material
Source: PubMed Central journal article supplement (PMC5548526)
Supplement: 10-1055-s-0037-1602386-s1700006table.pdf [file 10-1055-s-0037-1602386-s1700006table.pdf]

**Table 1** Exome sequencing filtering strategy

| <b>Criteria for filtering</b>                                                      | <b>No. of variants</b> |
|------------------------------------------------------------------------------------|------------------------|
| Total No. of variants                                                              | 78,801                 |
| Number of rare variants (MAF $\leq$ 0.02)                                          | 11,700                 |
| Exonic and splicing variants                                                       | 3,397                  |
| Exclusion of synonymous variants                                                   | 2,562                  |
| Variants following segregation pattern of autosomal recessive/X-linked inheritance | 211                    |
| Exclusion of variant present in-house WES data                                     | 32                     |
| Phenotypic correlation                                                             | 1 in <i>MED12</i>      |

Abbreviations: MAF, minor allele frequency; *MED12*, mediator complex subunit 12; WES, whole exome sequencing.
